# Supplementary material for: Stabilization through p-dimethylaminobenzaldehyde of a new NLO-active phase of [E-4-(4-dimethylaminostyryl)-1-methylpyridinium] iodide: synthesis, structural characterization and theoretical investigation of its electronic properties
Source: Royal Society of Chemistry journal article supplement (doi:10.1039/c0jm00466a), 2010-01-01
Supplement: c0jm00466a.pdf [file c0jm00466a.pdf]

**Stabilization through *p*-dimethylaminobenzaldehyde of a new NLO-active phase of [*E*-4-(4-dimethylaminostyryl)-1-methylpyridinium] iodide: synthesis, structural characterization and theoretical investigation of its electronic properties**

Francesca Nunzi,<sup>a</sup> Simona Fantacci,<sup>b\*</sup> Elena Cariati,<sup>c\*</sup> Elisa Tordin,<sup>c</sup> Nicola Casati<sup>d</sup> and Piero Macchi<sup>d,e\*</sup>

<sup>a</sup> Dipartimento di Chimica, Università degli Studi di Perugia, via Elce di Sotto 8, I-06123 Perugia, Italy. <sup>b</sup> Istituto CNR di Scienze e Tecnologie Molecolari (ISTM-CNR), c/o Dipartimento di Chimica, Università degli Studi di Perugia, via Elce di Sotto 8, I-06123 Perugia, Italy. <sup>c</sup> Dipartimento di Chimica Inorganica, Metallorganica e Analitica “Lamberto Malatesta” dell’Università degli Studi di Milano and UdR dell’INSTM di Milano, via Venezian 21, 20133 Milano, Italy. <sup>d</sup> Dipartimento di Chimica Strutturale e Stereochimica Inorganica and Centro di Eccellenza CIMAINA dell’Università degli Studi di Milano, via Venezian 21, 20133 Milano, Italy. <sup>e</sup> Departement für Chemie und Biochemie, Universität Bern, Freiestrasse 3, CH-3012 Bern, Switzerland

## Supporting Information

$^1\text{H}$  NMR ( $\text{CD}_3\text{COCD}_3$ , 400.1 MHz, 298 K):

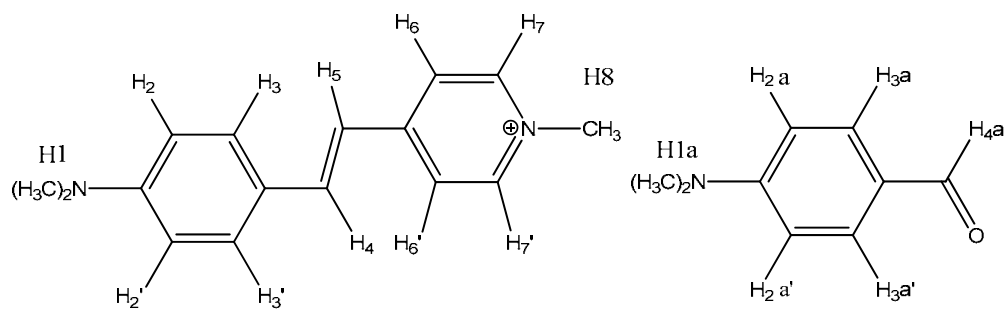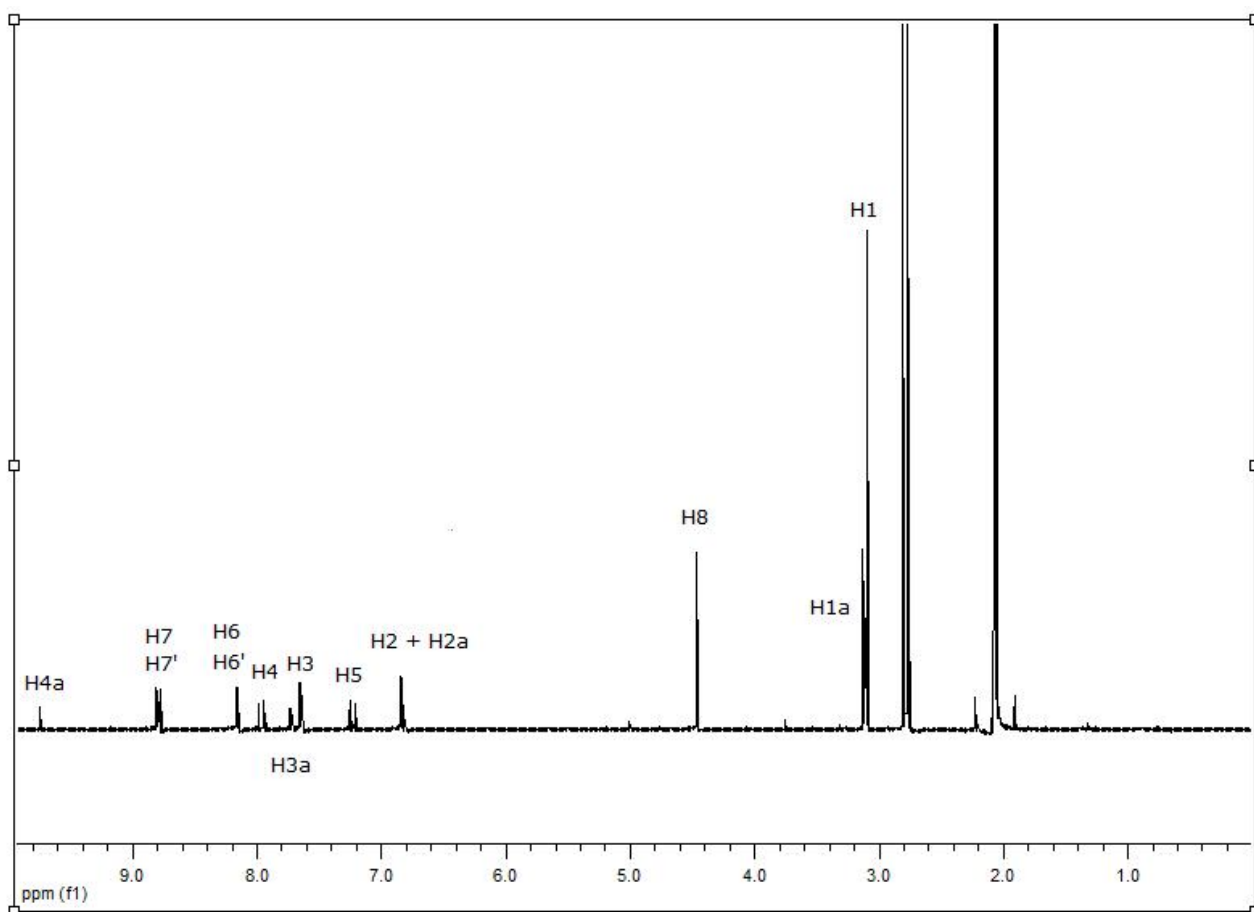

| ppm  | Multiplicity (J Hz) | Integral | Assignment |
|------|---------------------|----------|------------|
| 9.74 | s                   | 0.30     | H4a        |
| 8.80 | d (6.8)             | 2.00     | H7 H7'     |
| 8.16 | d (6.8)             | 2.03     | H6 H6'     |
| 7.97 | d (16.0)            | 0.97     | H5         |
| 7.72 | d (8.9)             | 0.70     | H3a        |
| 7.65 | d (9.0)             | 1.93     | H3         |
| 7.24 | d (16.0)            | 0.96     | H4         |
| 6.83 | m                   | 2.64     | H2+H2a     |
| 4.46 | s                   | 2.80     | H8         |
| 3.12 | s                   | 1.89     | H1a        |
| 3.09 | s                   | 5.40     | H1         |

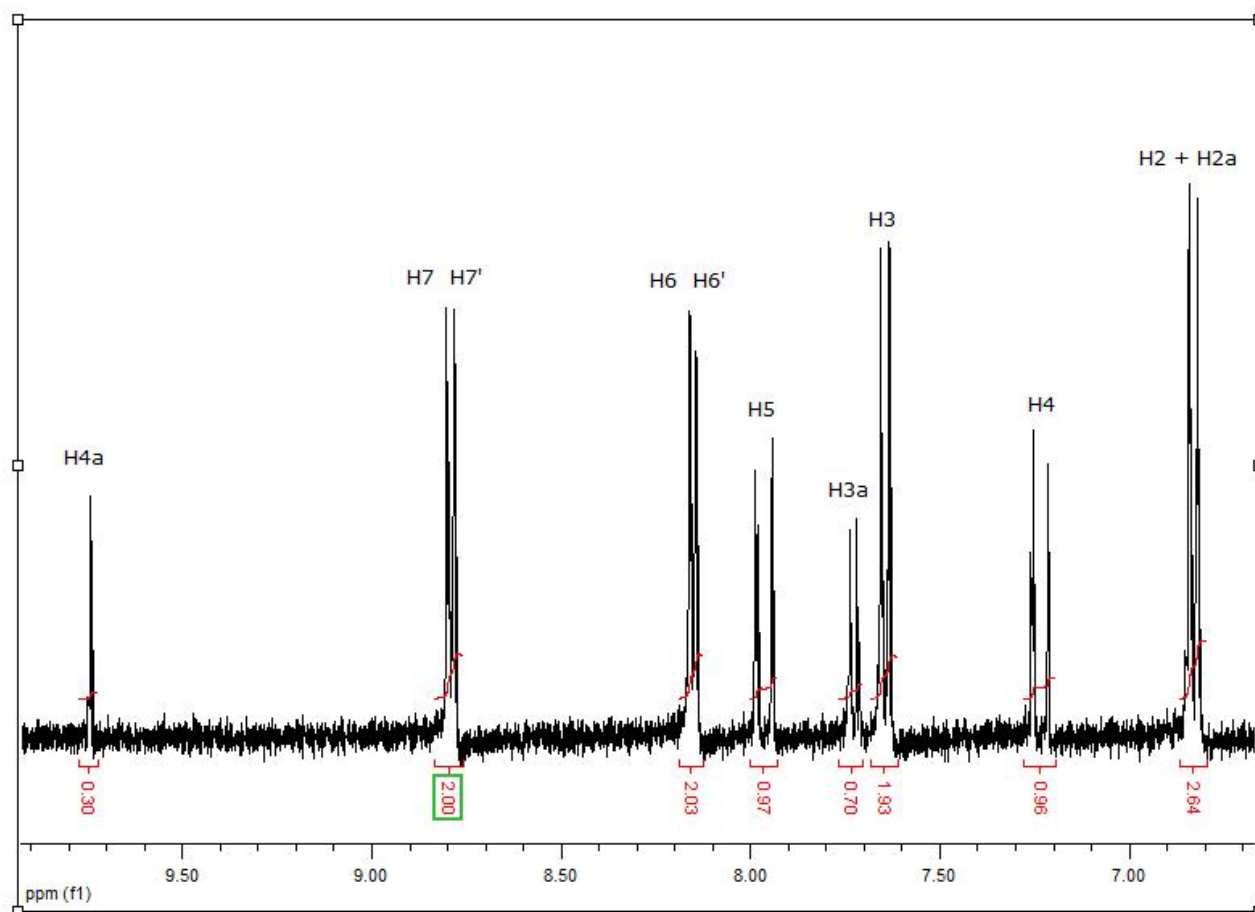

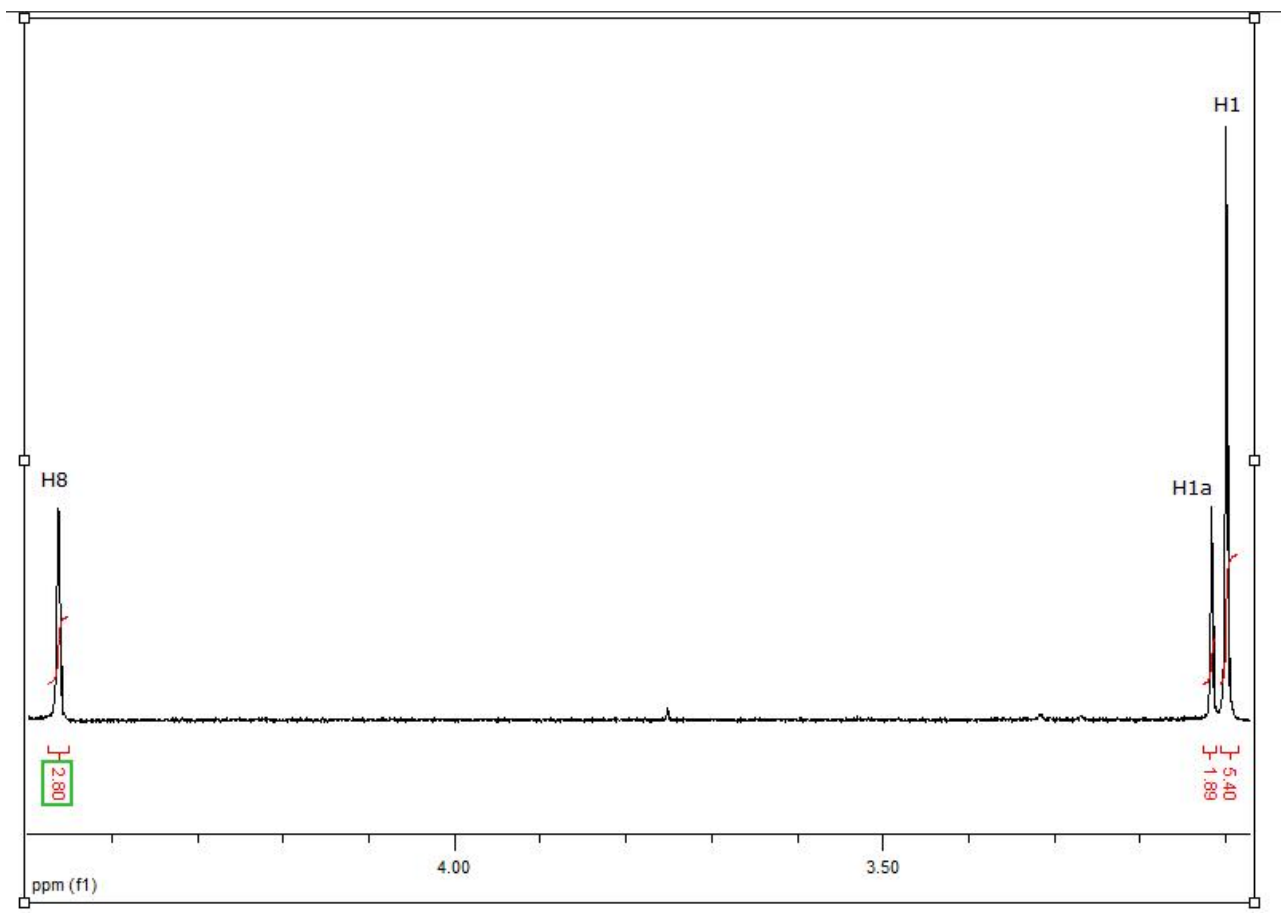

Table S1: Lowest excitation energies (eV) and oscillator strengths (in parentheses) for the [DAMS]<sup>+</sup> monomer and dimer calculated at different levels of theory. The experimental absorption maximum of the [DAMS]<sup>+</sup> is 471 nm (2.633 eV).

|       | BP86    | LB94    | B3LYP   | BHandH  | CC2     |
|-------|---------|---------|---------|---------|---------|
| MONO  | 2.496   | 2.395   | 2.696   | 2.902   | 2.342   |
| S0→S1 | (1.122) | (1.078) | (1.376) | (1.587) | (1.627) |
| DIME  | 1.297   | 1.238   | 1.877   | 2.646   | 2.125   |
| S0→S1 | (0.023) | (0.018) | (0.037) | (0.030) | (0.001) |

We carried out calculations with BP86/TZP, LB94/TZP, B3LYP/6-31g(d,p) and BHandH/6-31g(d,p) XC functionals and basis sets. A benchmark second order approximate coupled cluster (CC2) calculation as implemented in TURBOMOLE program package<sup>1,2</sup> was also performed on the same systems, see Table S1. The results for the monomer show that B3LYP provides an excellent agreement with the available experimental data (2.633 eV), while pure GGA functionals give red-shifted absorptions by ca. 0.1-0.2 eV. BHandH, which contains an increased amount of Hartree-Fock exchange with respect to B3LYP (50% vs. 20%), provides on the other hand rigidly blue-shifted values compared to the experiment, by ca. 0.3 eV. The CC2 excitation energy is consistent with GGA results, i.e. ca. 0.2 eV red-shifted compared to the experiment.

Moving to the dimer, it is interesting to notice that a H→L dark excitation is computed as the lowest excited state at all levels of calculation, even though, as already observed for the monomer, at different energy, depending on the level of theory. This is different from what previously found,<sup>3</sup> in which several spurious excited states were found to appear below the main optical transition when using GGA functionals and in some cases also hybrid functionals. Of particular significance is the fact that both BHandH and CC2 results predict the presence of this excited state, with the CC2 results being close to the B3LYP excitation energy (they differ by ca. 0.2 eV). Considering the analysis above and the overall good agreement with the experiment, both for the monomer and for various aggregates, we can thus conclude that our results are sufficiently accurate for the goal of the present investigation.

- 1 (a) Hättig, C.; Weigend, F., *J. Chem. Phys.* 2000, **113**, 5154; (b) Hättig, C.; Hellweg, A.; Kähn, A., *Phys. Chem. Chem. Phys.* 2006, **8**, 1159-1169.
- 2 Alhrichs, R.; al., e. TURBOMOLE v. 5.10, University of Karlsruhe, Germany;
- 3 R.J. Magyar, S: Tretiak *J. Chem. Theory. Comput.* 2007, **3**, 976.

**Table S2:** Excitation energy (E), oscillator strength (f) and composition of the lowest singlet excited states for the fish-bone 2 aggregate computed at B3LYP(6-31G(d,p)) level of theory.

|    | E<br>(eV) | E<br>(nm) | F      | MOs                                                            |
|----|-----------|-----------|--------|----------------------------------------------------------------|
| 1  | 1.8221    | 680       | 0.0419 | 58%(H-5→L+1)+37%(H-6→L+1)                                      |
| 2  | 2.1042    | 589       | 0.0446 | 67%(H-5→L+2)+30%(H-6→L+2)                                      |
| 3  | 2.2714    | 546       | 0.0485 | 50%(H-2→L+8)+27%(H-2→L+9)+13%(H-1→L+8)+6%(H-1→L+9)             |
| 4  | 2.3255    | 533       | 0.0152 | 90%(H-7→L+1)+7%(H-9→L)                                         |
| 5  | 2.3307    | 532       | 0.0537 | 77%(H-9→L)+10%(H-7→L+1)+8%(H-7→L)                              |
| 6  | 2.3829    | 520       | 0.1335 | 40%(H-1→L+9)+39%(H-1→L+8)+7%(H-2→L+11)                         |
| 7  | 2.3902    | 519       | 0.0493 | 87%(H-8→L+1)                                                   |
| 8  | 2.4108    | 514       | 0.3540 | 24%(H-4→L+3)+12%(H-6→L+1)+8%(H-8→L+1)+6%(H-6→L+2)+6%(H-5→L+1)  |
| 9  | 22.4368   | 509       | 1.1080 | 30%(H-7→L)+13%(H-6→L+1)+10%(H-9→L)+5%(H-7→L+2)                 |
| 10 | 2.4836    | 499       | 0.0995 | 63%(H-7→L+2)+8%(H-4→L+3)                                       |
| 11 | 2.5050    | 495       | 0.6234 | 27%(H-7→L+2)+10%(H-6→L+2)+9%(H-5→L+3)+8%(H-5→L+4)              |
| 12 | 2.5200    | 492       | 0.1371 | 87%(H-11→L)                                                    |
| 13 | 2.5469    | 487       | 0.0594 | 29%(H-3→L+3)+14%(H-3→L+5)+10%(H→L+4)+9%(H-2→L+2)               |
| 14 | 2.5548    | 485       | 0.0330 | 90%(H-5→L+3)                                                   |
| 15 | 2.5823    | 480       | 0.0308 | 74%(H-10→L+1)+18%(H-8→L+2)                                     |
| 16 | 2.6297    | 471       | 0.7761 | 29%(H-7→L+3)+14%(H-6→L+2)+12%(H-3→L+5)                         |
| 17 | 2.6342    | 471       | 0.3495 | 52%(H→L+10)+6%(H-3→L+5)                                        |
| 18 | 2.6784    | 463       | 0.3495 | 84%(H-1→L+11)                                                  |
| 19 | 2.6893    | 461       | 0.1385 | 34%(H-7→L+3)+12%(H-1→L+11)+10%(H-1→L+9)                        |
| 20 | 2.7752    | 450       | 0.0956 | 18%(H-2→L+8)+17%(H-1→L+10)+8%(H-7→L+3)+7%(H-2→L+9)+6%(H-4→L+3) |
| 21 | 2.8203    | 440       | 0.6712 | 52%(H-3→L+10)+18%(H-3→L+5)                                     |
| 22 | 2.8930    | 428       | 0.0963 | 92%(H-2→L+12)                                                  |
| 23 | 2.9137    | 425       | 1.0219 | 26%(H-2→L+9)+18%(H-3→L+10)+10%(H-1→L+8)                        |
| 24 | 2.9400    | 422       | 3.0532 | 23%(H-3→L+10)+14%(H-3→L+5)+10%(H-5→L+6)+9%(H-2→L+9)            |
| 25 | 2.9858    | 415       | 0.6997 | 40%(H-5→L+4)+40%(H-5→L+6)                                      |
| 26 | 3.0466    | 407       | 0.0847 | 52%(H-5→L+4)+ 40%(H-5→L+6)                                     |
| 27 | 3.0536    | 406       | 0.0451 | 84%(H-4→L+8)+12%(H-4→L+9)                                      |

**Table S3.** Excitation energy (E), oscillator strength (f) and composition of the lowest singlet excited states (Si) with  $f > 0.02$  for the fishbone 1 aggregate computed at B3LYP(6-31G(d,p)) level of theory –negative charge.

|                 | E<br>(eV) | E<br>(nm) | f      | MOs                                               |
|-----------------|-----------|-----------|--------|---------------------------------------------------|
| S <sub>1</sub>  | 2.2238    | 557       | 0.0512 | 65%(H→L)+19%(H-1→L)+10%(H-2→L)                    |
| S <sub>2</sub>  | 2.2491    | 551       | 0.0623 | 50%(H→L+1)+32%(H-1→L+1)+8%(H-1→L)                 |
| S <sub>6</sub>  | 2.5976    | 477       | 0.2100 | 46%(H→L+3)+26%(H-2→L+3)+9%(H-2→L)                 |
| S <sub>8</sub>  | 2.6485    | 468       | 0.1306 | 65%(H→L+2)+24%(H-3→L+2)                           |
| S <sub>9</sub>  | 2.7118    | 457       | 0.1283 | 52%(H-1→L+2)+29%(H-3→L+2)                         |
| S <sub>10</sub> | 7292      | 454       | 0.1167 | 34%(H→L+3)+17%(H-1→L+3)+16%(H-2→L)+11%(H-3→L+1)   |
| S <sub>11</sub> | 2.7436    | 452       | 0.1165 | 52%(H-1→L+3)+13%(H-2→L)+11%(H-3→L+1)              |
| S <sub>12</sub> | 2.8285    | 438       | 0.1514 | 35%(H-3→L+1)+10%(H-1→L+2)                         |
| S <sub>13</sub> | 2.9536    | 420       | 0.4476 | 72%(H-2→L+2)                                      |
| S <sub>14</sub> | 2.9693    | 417       | 0.7401 | 24%(H-3→L+2)+23%(H-2→L+2)+12%(H→L+3)+16%(H-2→L+3) |
| S <sub>16</sub> | 3.1201    | 397       | 2.5358 | 16%(H-2→L+3)+12%(H-3→L+2)+10%(H-1→L+2)            |

**Table S4.** Excitation energy (E), oscillator strength (f) and composition of the lowest singlet excited states (Si) with  $f > 0.02$  for the [DAMS<sup>+</sup>] dimer aggregate computed at B3LYP(6-31G(d,p)) level of theory –negative charge.

|                | E<br>(eV) | E<br>(nm) | f      | MOs                                |
|----------------|-----------|-----------|--------|------------------------------------|
| S <sub>1</sub> | 2.2618    | 548       | 0.0638 | 87%(H→L)+10%(H-1→L)                |
| S <sub>2</sub> | 2.5643    | 483       | 0.1793 | 58%(H-1→L)+34%(H→L+1)              |
| S <sub>3</sub> | 2.773     | 446       | 0.1474 | 54%(H-1→L)+18%(H→L+1)              |
| S <sub>4</sub> | 3.0169    | 411       | 1.9670 | 34%(H-1→L+1)+27%(H→L+1)+11%(H-1→L) |

**Table S5.** Excitation energy (E), oscillator strength (f) and composition of the lowest singlet excited states (S<sub>i</sub>) with  $f > 0.02$  for the [DAMS<sup>+</sup>] monomer computed at B3LYP(6-31G(d,p)) level of theory –negative charge.

|                | E<br>(eV) | E<br>(nm) | f      | MOs      |
|----------------|-----------|-----------|--------|----------|
| S <sub>1</sub> | 2.8871    | 429       | 1.3026 | 72%(H→L) |

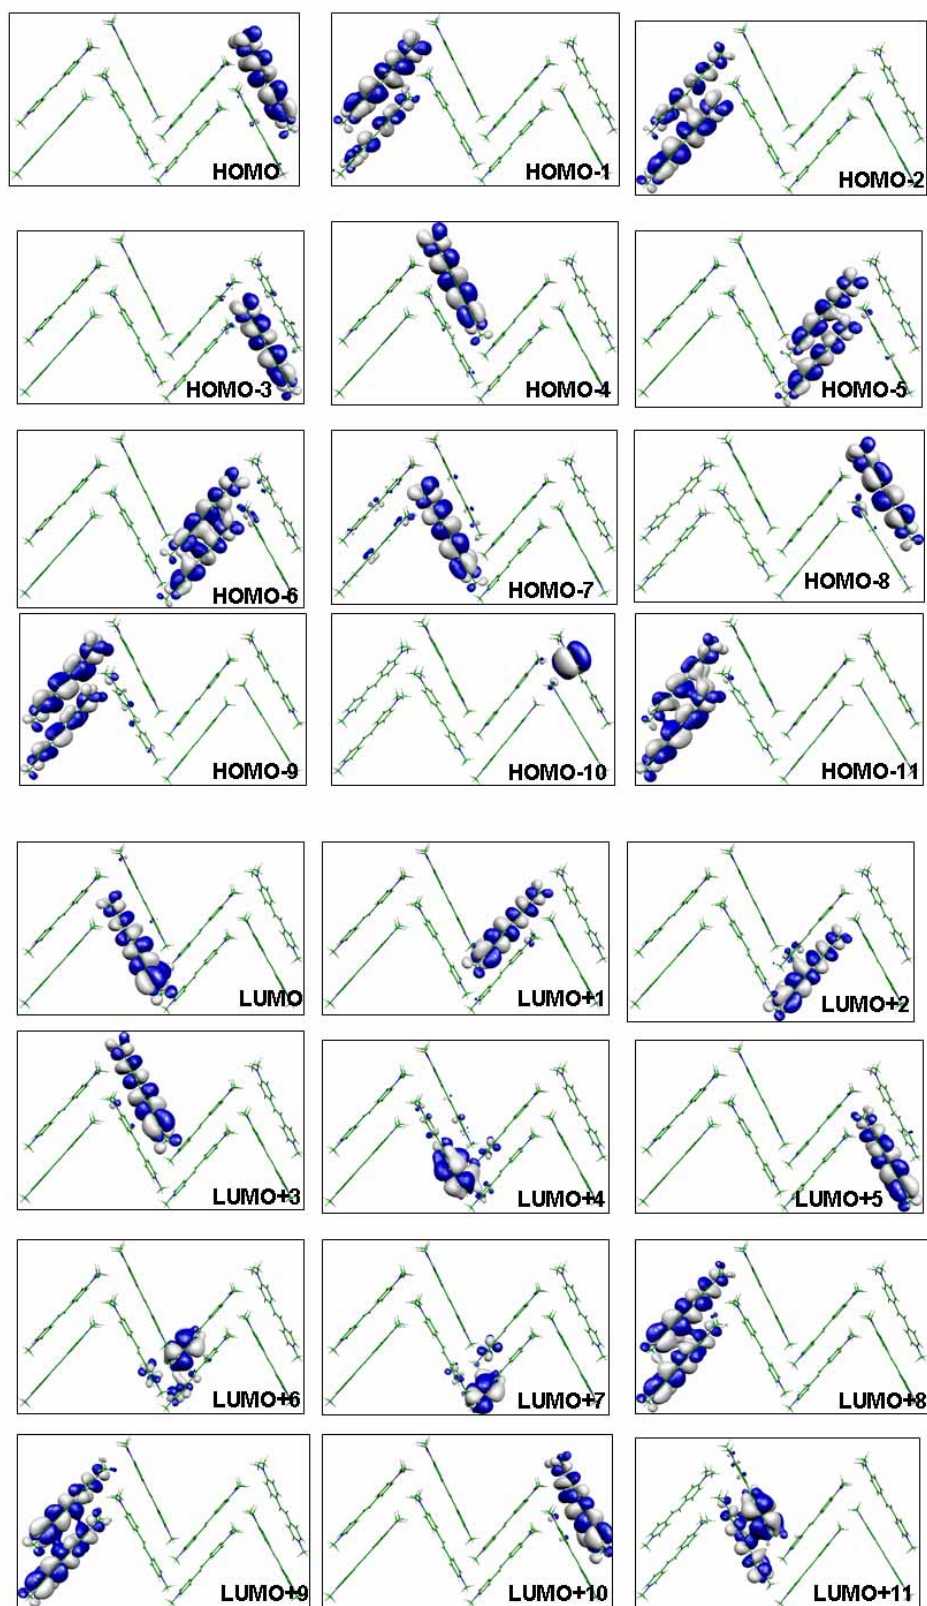

Figure S1: Calculated MOs for the fishbone-like model 2



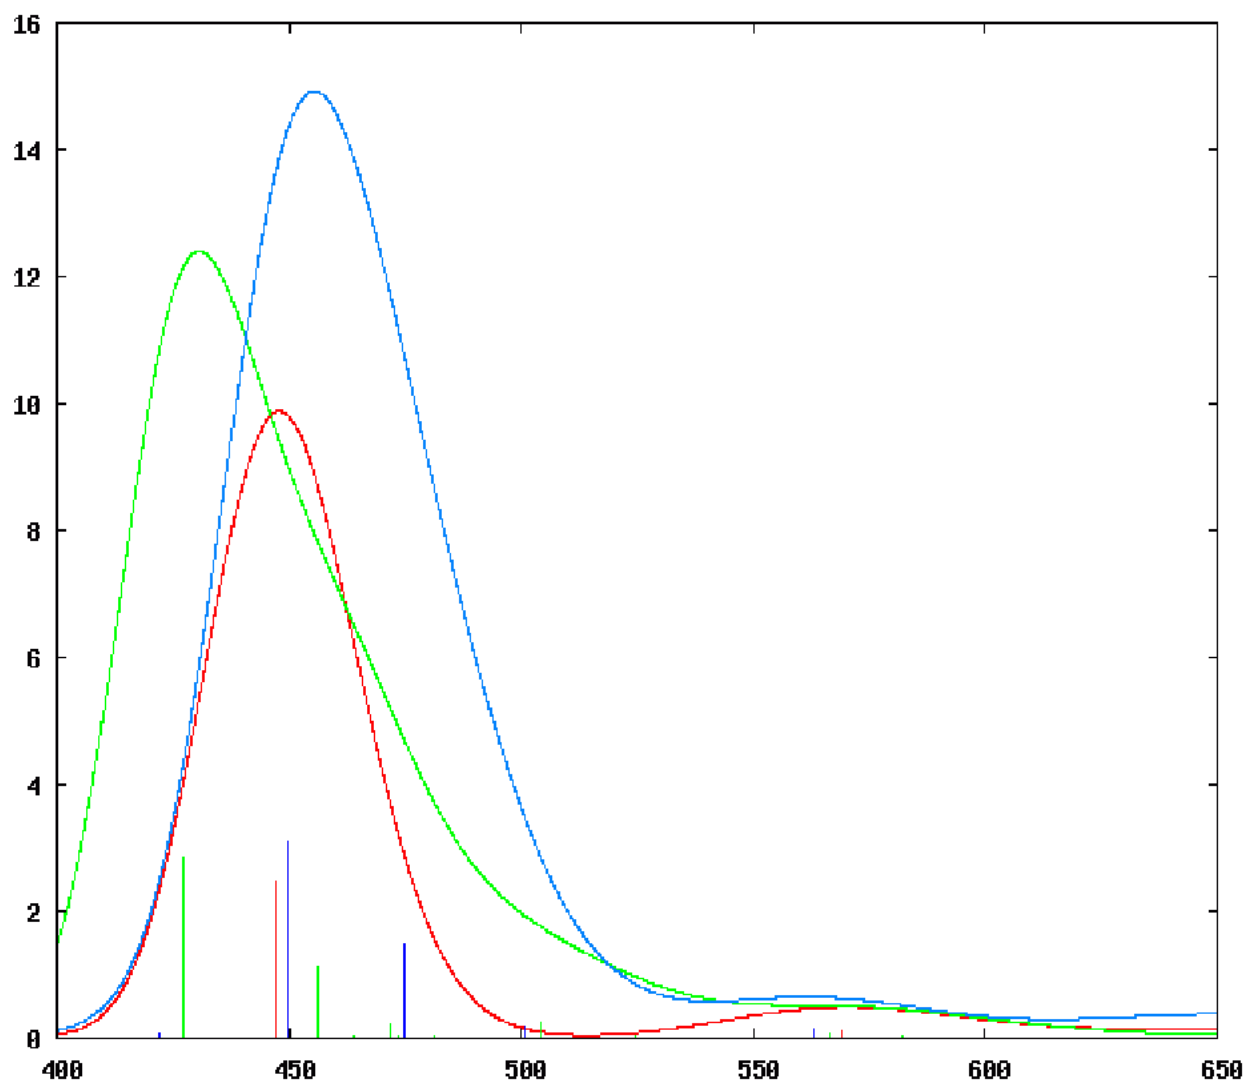

**Figure S2:** Calculated (B3LYP/6-31G(d,p)) absorption spectra of the slipped dimer (red line), tetrameric model **1** (green line) and the fishbone-like structural motif where four [DAMS<sup>+</sup>] chromophores stacked on two adjacent columns are facing towards the N-methyl groups (blue line).

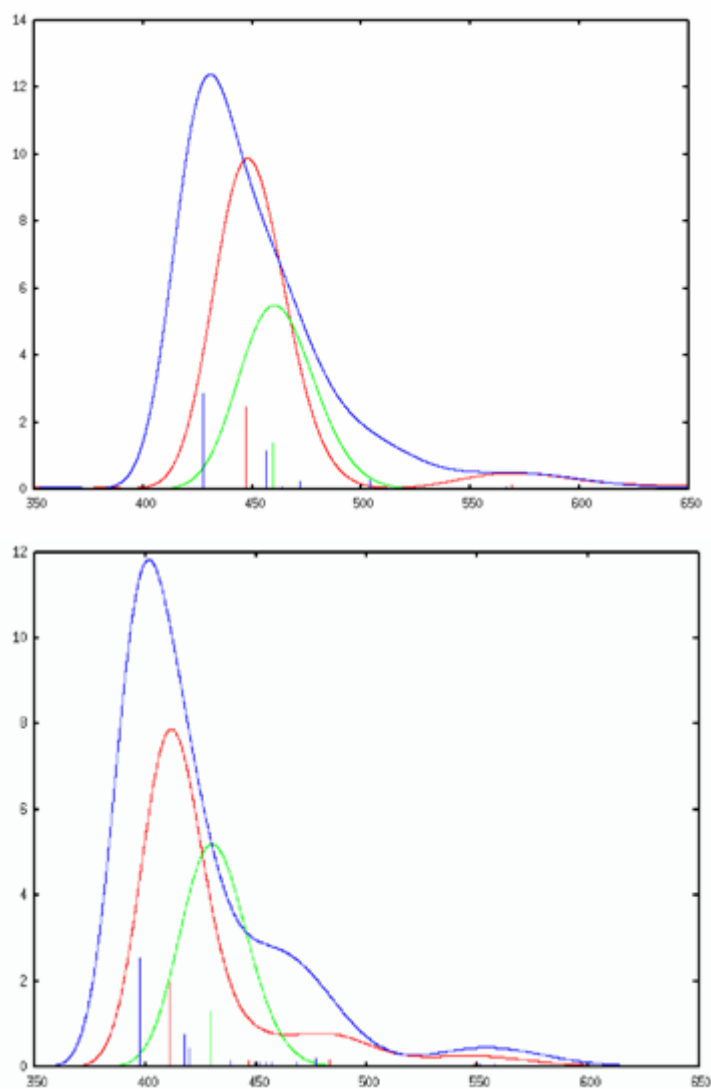

**Figure S3:** Calculated (B3LYP/6-31G(d,p)) absorption spectra of monomeric [DAMS<sup>+</sup>] (green line), dimeric J-type stacking (red line) and fishbone-like aggregates models 1 (blue line), only cations (top panel) and with negative charges located at the X-ray counteranions position (bottom panel).
